# Supplementary material
Source: publisher figshare collection journal article supplement (https://tandf.figshare.com/articles/dataset/_/13656175)

## 伦理委员会预审通知函

Notification Letter for Pre-review

研究者: 韩序

您提交的环状 RNAcirc\_0071036 靶向调控 miR-489 参与胰腺癌恶性生物学行为及肿瘤代谢的机制研究的研究项目已经经过复旦大学附属中山医院伦理委员会预审查, 预审编号为 Y2017-012, 预审审查结果为 同意申报, 具体意见: 当项目批准立项后, 研究者必须将正式研究方案及知情同意书提交伦理审查委员会审查, 批准后方可实施。

主任/副主任委员签名:

复旦大学附属中山医院伦理委员会 (盖章)

日期: 2017.02.16

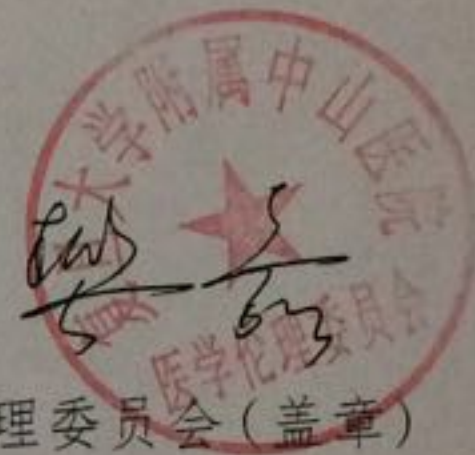

Supplement: Supplementary file 1 [file 1]
